# Supplementary material
Source: PubMed Central journal article supplement (PMC7904477)
Supplement: NIHMS1663977-supplement-RNR-SI-text.pdf [file NIHMS1663977-supplement-RNR-SI-text.pdf]

## Supporting Information

### **Gated Proton Release During Radical Transfer at the Subunit Interface of Ribonucleotide Reductase**

Chang Cui,<sup>a</sup> Brandon L. Greene,<sup>a,b,\*</sup> Gyunghoon Kang,<sup>c,d</sup> Catherine L. Drennan,<sup>c,d,e,f</sup> JoAnne Stubbe,<sup>c,e,\*</sup> and Daniel G. Nocera<sup>a,\*</sup>

<sup>a</sup> *Department of Chemistry and Chemical Biology, Harvard University, 12 Oxford Street, Cambridge, MA 02138*

<sup>b</sup> *Department of Chemistry and Biochemistry, University of California Santa Barbara, Santa Barbara CA 93106*

<sup>c</sup> *Department of Chemistry, Massachusetts Institute of Technology, Cambridge MA 20139*

<sup>d</sup> *Howard Hughes Medical Institute, Massachusetts Institute of Technology, Cambridge MA 20139*

<sup>e</sup> *Department of Biology, Massachusetts Institute of Technology, Cambridge MA 20139*

<sup>f</sup> *Fellow, Bio-inspired Solar Energy Program, Canadian Institute for Advanced Research, Toronto, ON M5G 1M1*

Email: \*greene@chem.ucsb.edu, \*stubbe@mit.edu, \*dnocera@fas.harvard.edu

## Table of Contents

|                                                                                                                                              |    |
|----------------------------------------------------------------------------------------------------------------------------------------------|----|
| <b>Figure S1.</b> Excited-state reaction pathways accompanying photophysical schemes of photo $\beta_2$ systems                              | S3 |
| <b>Figure S2.</b> Experimental design of transient absorption/emission kinetics                                                              | S4 |
| <b>Figure S3.</b> Extended view of the docking model of [Re] photooxidant                                                                    | S5 |
| <b>Figure S4.</b> $K_d$ determination for [Re]-labeled E <sub>52</sub> Q-photo $\beta_2$ with wt $\alpha_2$                                  | S6 |
| <b>Figure S5.</b> Representative [Re]* emission kinetics and associated fits.                                                                | S7 |
| <b>Figure S6.</b> Transient absorption spectra of E <sub>52</sub> Q-photo $\beta_2$ and E <sub>52</sub> Q/Y <sub>356</sub> F-photo $\beta_2$ | S8 |
| <b>References</b>                                                                                                                            | S9 |

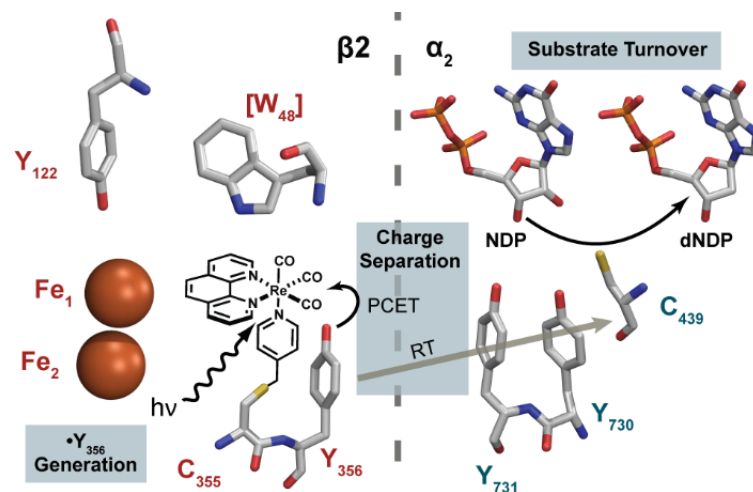

### Photophysical Scheme

Table 1 Entry

Lifetime

1,5

$$\tau_0 = \left( \frac{1}{k_0} \right)$$

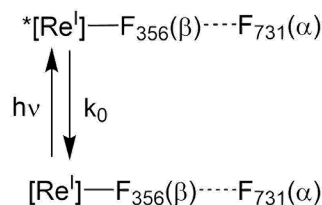

2,3,7,9,11

$$\tau_{\text{obs}} = \left( \frac{1}{k_0 + k_{\text{PCET}}} \right)$$

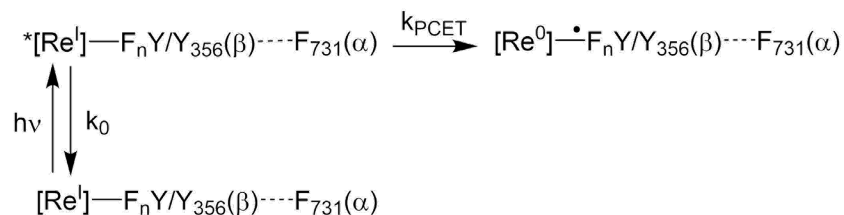

4.8,10,12

$$\tau_{\text{obs}} = \left( \frac{1}{k_0 + (k_{\text{PCET}} + k_{\text{RT}})} \right)$$

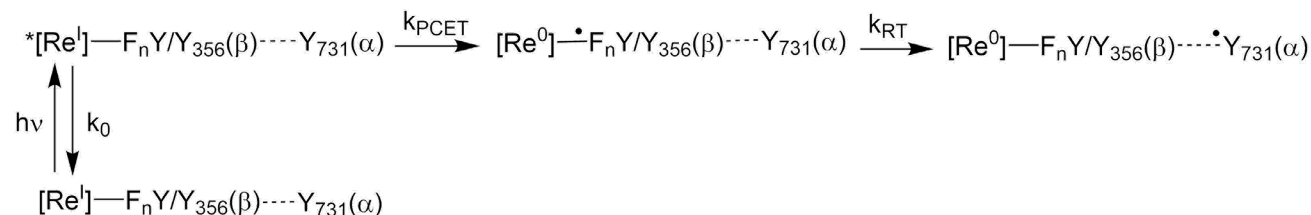

**Figure S1.** (Top) Excited-state reaction pathways after excitation of  $[\text{Re}^I]^*$  in photo $\beta_2$ . Figure 3 is reproduced here for convenience to the reader. (Bottom) description of the lifetimes ( $\tau_0$  and  $\tau_{\text{obs}}$ ) listed in Table 1 of text and accompanying photophysical schemes that describe the lifetimes.

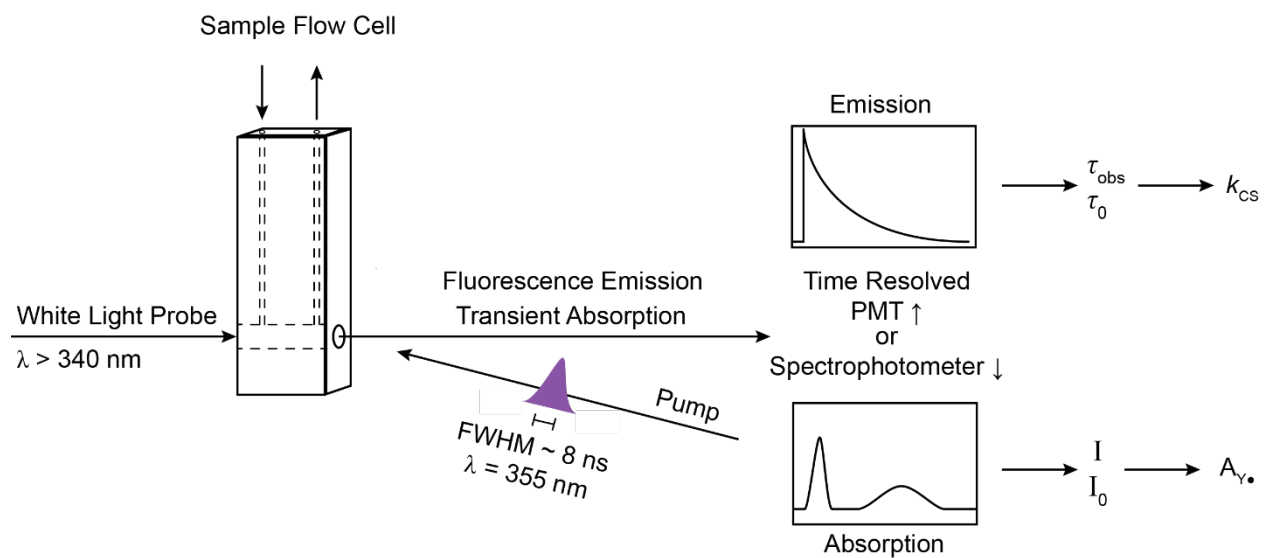

**Figure S2.** Schematic of the emission lifetime and transient absorption experimental setup and data processing.

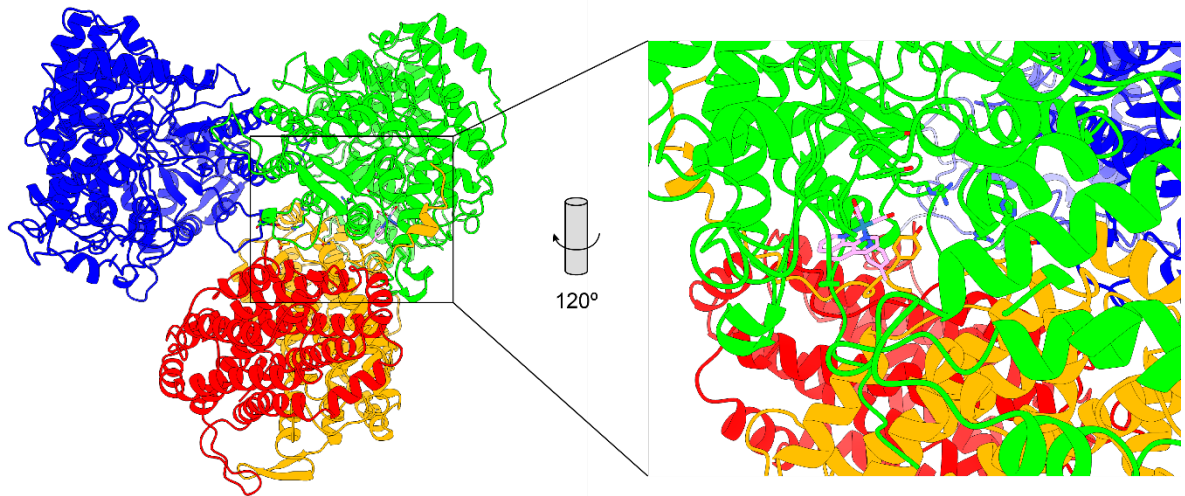

**Figure S3.** Expanded alternative views of the docked [Re] site in the cryo-EM RNR structure.

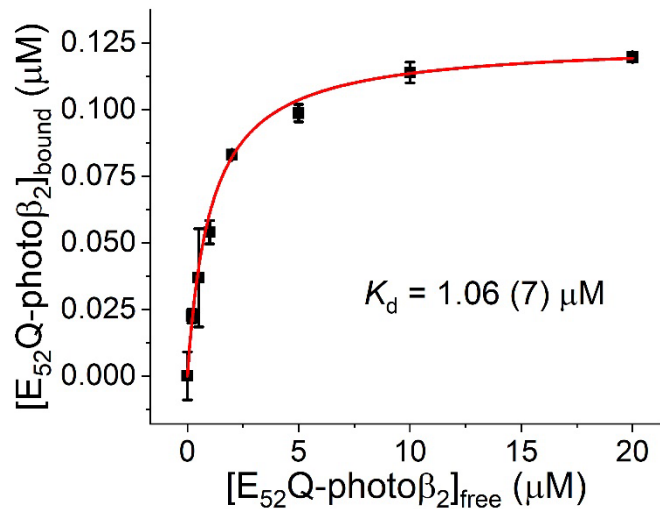

**Figure S4.**  $K_d$  determination for [Re]-labeled E<sub>52</sub>Q-photoβ<sub>2</sub> with wt α<sub>2</sub>. Conditions as described in subsection “ $K_d$  determination” of the Methods. The  $K_d$  of the wt α<sub>2</sub>β<sub>2</sub> interaction is 0.2 μM,<sup>1</sup> whereas the  $K_d$  of the wt α<sub>2</sub> photoβ<sub>2</sub> interaction is 0.7 μM,<sup>2</sup> the  $K_d$  of the wt α<sub>2</sub> E<sub>52</sub>Q β<sub>2</sub> 0.12 μM<sup>3</sup> and the  $K_d < 0.4$  nM for radical-trapped cryo-EM complex.<sup>4</sup>

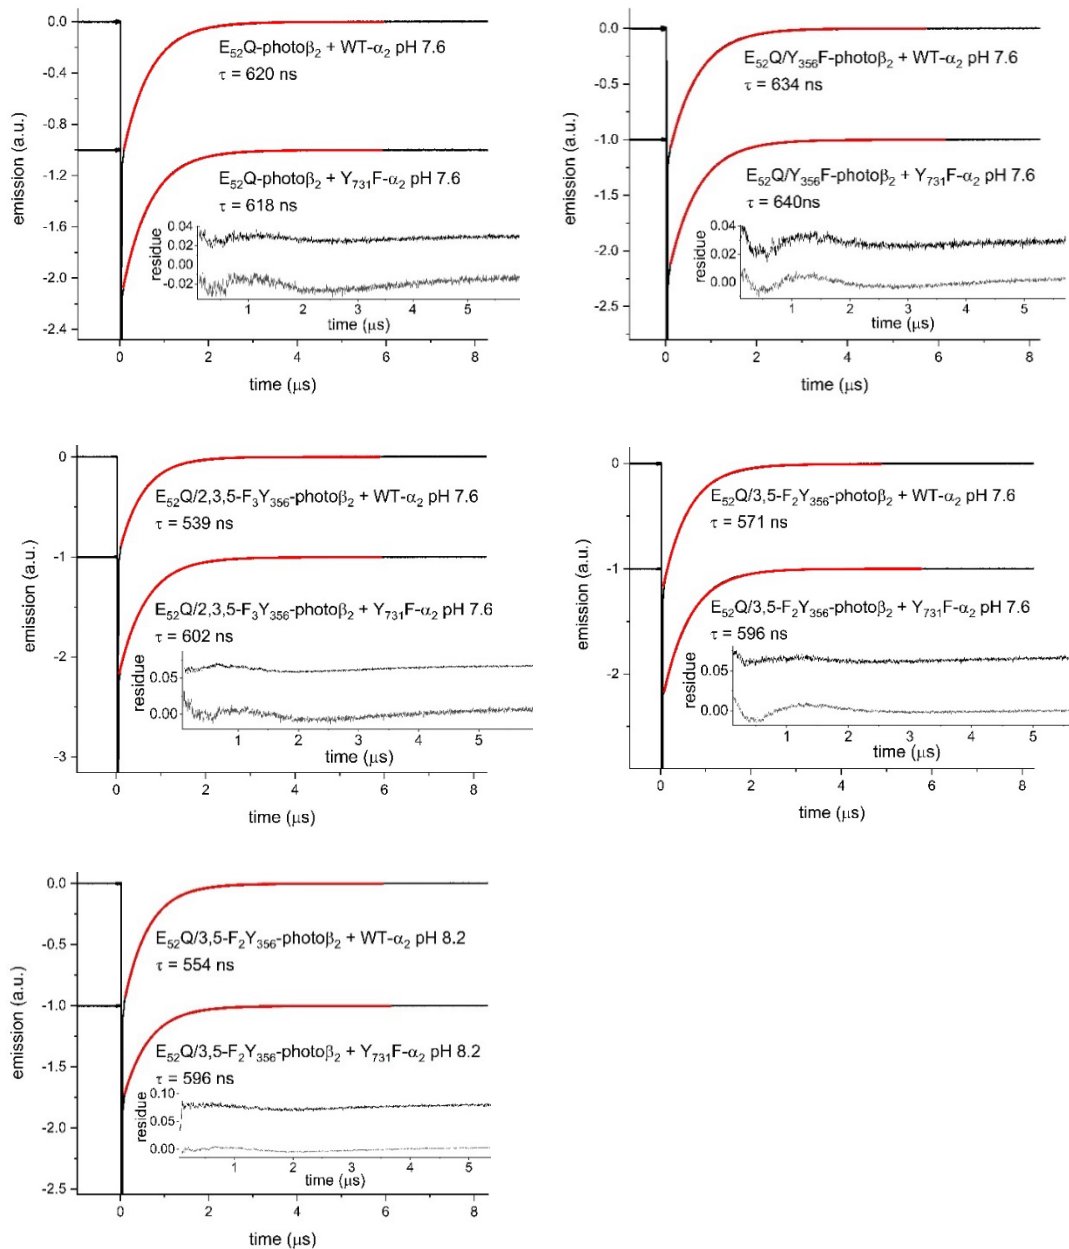

**Figure S5.** Representative time traces of the emission  $[Re^I]^*$  and the mono-exponential fitting with the residual difference shown in the figure inset. The emission kinetics were measured with  $5 \mu\text{M } \alpha_2$ ,  $2 \mu\text{M } E_{52}Q\text{-photo}\beta_2$  variants,  $1 \text{ mM CDP}$ ,  $3 \text{ mM ATP}$  in assay buffer and lifetimes reported represent the average of three independent measurements consisting of 100 traces each.

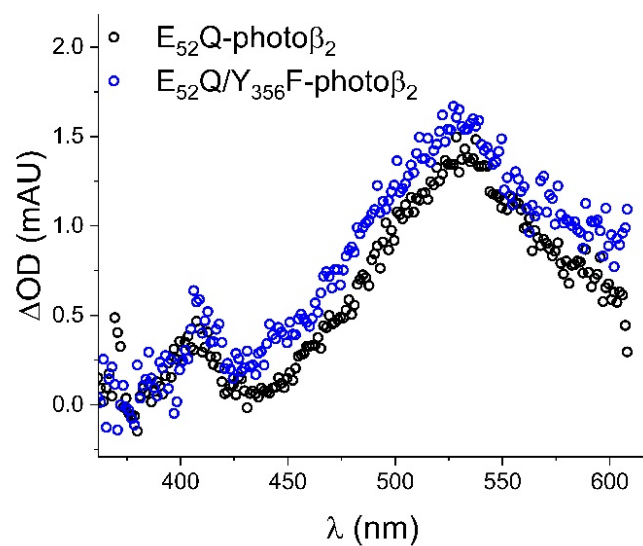

**Figure S6.** Transient absorption spectra of  $E_{52}\text{Q-photo}\beta_2$  and  $E_{52}\text{Q/Y}_{356}\text{F-photo}\beta_2$ . Conditions as described in Transient absorption spectroscopy subsection of the Methods.



## References

- (1) Climent, I.; Sjöberg, B. M.; Huang, C. Y. Carboxyl-Terminal Peptides as Probes for *Escherichia coli* Ribonucleotide Reductase Subunit Interaction: Kinetic Analysis of Inhibition Studies. *Biochemistry* **1991**, *30*, 5164–5171.
- (2) Pizano, A. A.; Lutterman, D. A.; Holder, P. G.; Teets, T. S.; Stubbe, J.; Nocera, D. G. Photo-Ribonucleotide Reductase  $\beta_2$  by Selective Cysteine Labeling with a Radical Phototrigger. *Proc. Natl. Acad. Sci. U.S.A.* **2012**, *109*, 39–43.
- (3) Lin, Q.; Parker, M. J.; Taguchi, A. T.; Ravichandran, K.; Kim, A.; Kang, G.; Shao, J.; Drennan, C. L.; Stubbe, J. Glutamate 52- $\beta$  at the  $\alpha/\beta$  Subunit Interface of *Escherichia coli* Class Ia Ribonucleotide Reductase is Essential for Conformational Gating of Radical Transfer. *J. Biol. Chem.* **2017**, *292*, 9229–9239.
- (4) Kang, G.; Taguchi, A. T.; Stubbe, J.; Drennan, C. L. Structure of a Trapped Radical Transfer Pathway within a Ribonucleotide Reductase Holocomplex. *Science* **2020**, *368*, 424–427.
